# Supplementary material for: Polarizable molecular dynamics simulations on the conductivity of pure 1-methylimidazolium acetate systems
Source: Royal Society of Chemistry journal article supplement (doi:10.1039/d2cp01501c), 2022-01-01
Supplement: d2cp01501c1.pdf [file d2cp01501c1.pdf]

# Polarizable molecular dynamics simulations on the conductivity of 1-methylimidazolium acetate systems: Electronic Supporting Information

Florian Joerg<sup>a,b</sup> and Christian Schröder<sup>\*a</sup>

May 13, 2022

## Contents

|          |                                                       |          |
|----------|-------------------------------------------------------|----------|
| <b>1</b> | <b>Force field parameters</b>                         | <b>2</b> |
| 1.1      | Electrostatic parameters . . . . .                    | 2        |
| 1.2      | Intramolecular parameters . . . . .                   | 4        |
| 1.3      | Lennard-Jones parameter . . . . .                     | 8        |
| <b>2</b> | <b>Physico-chemical properties</b>                    | <b>9</b> |
| 2.1      | Conductivity and diffusion coefficients . . . . .     | 9        |
| 2.2      | Haven ratio of the Nernst-Einstein relation . . . . . | 10       |
| 2.3      | Bahe-Varela fits . . . . .                            | 11       |
| 2.4      | Computational dielectric spectrum . . . . .           | 12       |
| 2.5      | The Voronoi shell-resolved PMF . . . . .              | 13       |
| 2.6      | Hydrogen bond lifetimes . . . . .                     | 15       |

---

<sup>a</sup> University of Vienna, Faculty of Chemistry, Department of Computational Biological Chemistry, Währingerstr. 17, A-1090 Vienna, Austria; Tel: +43 1 4277 52711; E-mail: christian.schroeder@univie.ac.at

<sup>b</sup> University of Vienna, Vienna Doctoral School in Chemistry (DoSChem), Währingerstr. 42, A-1090 Vienna, Austria

# 1 Force field parameters

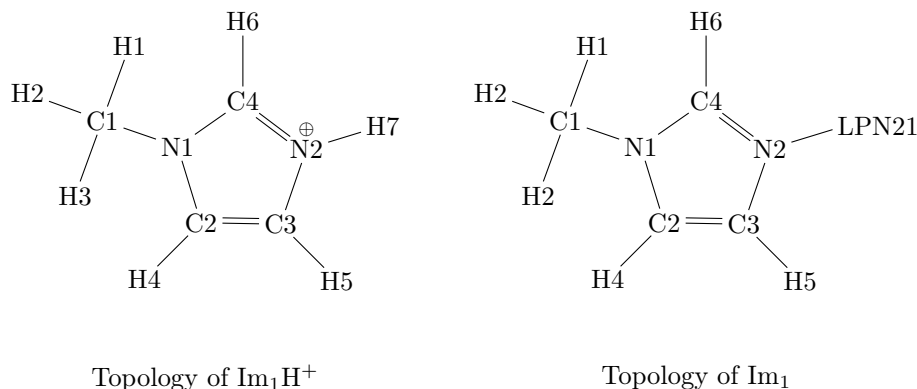

Figure S1: Topology of Im<sub>1</sub>H<sup>+</sup> and Im<sub>1</sub>, displaying each particle with its atom name used by CHARMM

Figure S1 displays the topology of 1-methylimidazolium (Im<sub>1</sub>H<sup>+</sup>) and 1-methylimidazole (Im<sub>1</sub>), with the name of each atom used during the MD simulation. The corresponding atom type to each atom name can be found in Table S1.

## 1.1 Electrostatic parameters

Partial charges ( $q$ ), polarizabilities ( $\alpha$ ) and Thole parameters can also be seen for all four molecules. As no Drude particle is assigned to hydrogens, they have neither a polarizability nor a Thole value. Their corresponding polarizability was added to the parent C or N atom. Partial charges, polarizabilities and Thole parameters were not fitted during the force-matching procedure, but additional fitting using the CHELPG method was done. In the case of the the nitrogen atom of Im<sub>1</sub> (N2), the whole charge is carried by the lonepair (LPN21).

To increase the stability of polarizable MD simulations using Drude oscillators, usually a maximum distance of the mobile Drude particle to its polarizable atom is defined. A standard maximum distance is 0.2 Å. As shown in Fig. S2 this distance is rarely realized in our simulations and indicate stable conditions.

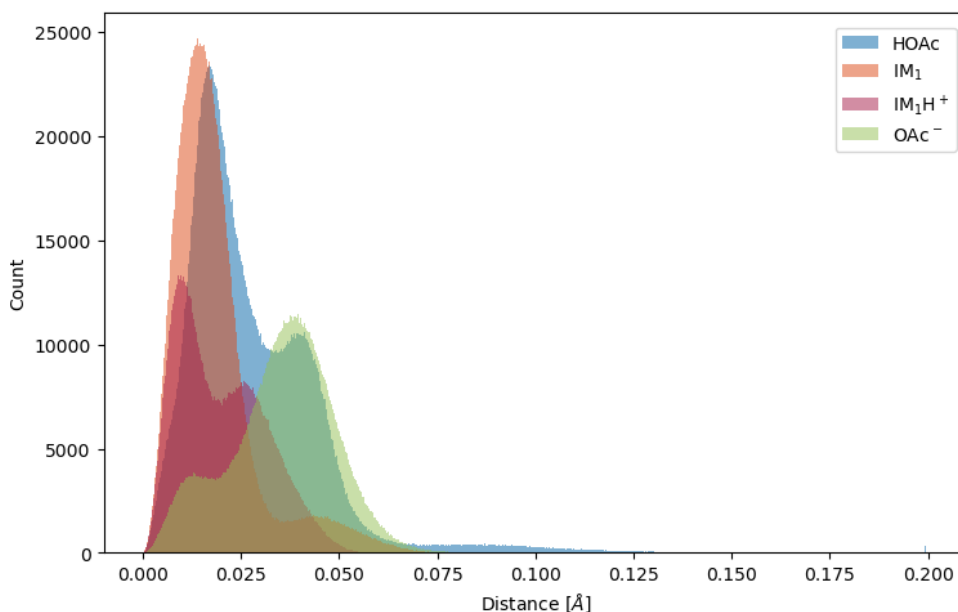

Figure S2: Histogram of the distances of the mobile Drude particles from their polarizable atoms. As clearly visible, the hard wall of 0.2 Å is rarely visited.

Table S1: Partial charges, polarizabilities and Thole parameters of the atoms for the molecules  $\text{Im}_1\text{H}^+$  and  $\text{Im}_1$ , acetate ( $\text{OAc}^-$ ), acetic acid ( $\text{HOAc}$ )

| $\text{Im}_1\text{H}^+$ |        |        |                         |                        | $\text{Im}_1$ |        |        |                         |                        |
|-------------------------|--------|--------|-------------------------|------------------------|---------------|--------|--------|-------------------------|------------------------|
| atom                    | type   | q [e]  | $\alpha [\text{\AA}^3]$ | Thole [ $\text{\AA}$ ] | atom          | type   | q [e]  | $\alpha [\text{\AA}^3]$ | Thole [ $\text{\AA}$ ] |
| C1                      | CD33F  | -0.182 | -1.181                  | 1.1                    | C1            | CD33G  | -0.161 | -1.081                  | 1.0                    |
| H1                      | HDA3A  | 0.135  |                         |                        | H1            | HDA3A  | 0.094  |                         |                        |
| H2                      | HDA3A  | 0.135  |                         |                        | H2            | HDA3A  | 0.094  |                         |                        |
| H3                      | HDA3A  | 0.135  |                         |                        | H3            | HDA3A  | 0.094  |                         |                        |
| N1                      | ND2R5C | 0.158  | -0.803                  | 1.0                    | N1            | ND2R5A | 0.140  | -1.063                  | 1.3                    |
| C2                      | CD2R5D | -0.107 | -1.083                  | 1.1                    | C2            | CD2R5A | -0.369 | -1.378                  | 1.3                    |
| H4                      | HDR5D  | 0.195  |                         |                        | H4            | HDR5A  | 0.150  |                         |                        |
| C3                      | CD2R5D | -0.047 | -1.083                  | 1.1                    | C3            | CD2R5A | 0.188  | -1.378                  | 1.3                    |
| H5                      | HDR5D  | 0.192  |                         |                        | H5            | HDR5A  | 0.053  |                         |                        |
| C4                      | CD2R5E | -0.023 | -1.253                  | 1.2                    | C4            | CD2R5B | 0.118  | -0.868                  | 1.3                    |
| H6                      | HDR5E  | 0.203  |                         |                        | H6            | HDR5B  | 0.073  |                         |                        |
| N2                      | ND2R5C | -0.157 | -0.803                  | 1.0                    | N2            | ND2R5B | 0.000  | -0.840                  | 1.0                    |
| H7                      | HDP1A  | 0.363  |                         |                        | LPN21         | LPD    | -0.474 |                         |                        |
| $\text{OAc}^-$          |        |        |                         |                        | $\text{HOAc}$ |        |        |                         |                        |
| atom                    | type   | q [e]  | $\alpha [\text{\AA}^3]$ | Thole [ $\text{\AA}$ ] | atom          | type   | q [e]  | $\alpha [\text{\AA}^3]$ | Thole [ $\text{\AA}$ ] |
| C1                      | CD2O2A | 0.708  | -1.016                  | 0.899                  | C1            | CD2O3A | 0.858  | -1.207                  | 0.708                  |
| C2                      | CD33A  | -0.194 | -1.681                  | 1.414                  | C2            | CD33C  | -0.300 | -2.114                  | 0.750                  |
| H1                      | HDA3A  | 0.004  |                         |                        | H1            | HDA3A  | 0.092  |                         |                        |
| H2                      | HDA3A  | 0.004  |                         |                        | H2            | HDA3A  | 0.092  |                         |                        |
| H3                      | HDA3A  | 0.004  |                         |                        | H3            | HDA3A  | 0.092  |                         |                        |
| O1                      | OD2C2A | 0.003  | -0.699                  | 2.399                  | O1            | OD2C3A | 0.000  | -0.922                  | 1.539                  |
| O2                      | OD2C2A | 0.003  | -0.699                  | 2.399                  | O2            | OD31F  | 0.000  | -1.280                  | 1.124                  |
|                         |        |        |                         |                        | H             | HDP1A  | 0.374  |                         |                        |
| LPO11                   | LPD    | -0.383 |                         |                        | LPO11         | LPD    | -0.319 |                         |                        |
| LPO12                   | LPD    | -0.383 |                         |                        | LPO12         | LPD    | -0.319 |                         |                        |
| LPO21                   | LPD    | -0.383 |                         |                        | LPO21         | LPD    | -0.285 |                         |                        |
| LPO22                   | LPD    | -0.383 |                         |                        | LPO22         | LPD    | -0.285 |                         |                        |

## 1.2 Intramolecular parameters

Table S2: Bonded parameters used in this study. Drude - parent atom force constants are uniformly set to  $1000 \text{ kcal mol}^{-1} \text{ \AA}^{-2}$ .

| Atoms           | $k_b$<br>[kcal mol <sup>-1</sup> \AA <sup>-2</sup> ] | $b_0$<br>[\AA] |
|-----------------|------------------------------------------------------|----------------|
| CD2R5A - HDR5A  | 365.0                                                | 1.083          |
| CD2R5A - CD2R5A | 516.3                                                | 1.468          |
| CD2R5B - HDR5B  | 340.0                                                | 1.090          |
| CD2R5D - HDR5D  | 365.0                                                | 1.083          |
| CD2R5D - CD2R5D | 548.0                                                | 1.435          |
| CD2R5E - HDR5E  | 340.0                                                | 1.090          |
| CD33F - HDA3A   | 322.0                                                | 1.111          |
| CD33G - HDA3A   | 322.0                                                | 1.111          |
| CD33A - CD2O2A  | 110.0                                                | 1.535          |
| CD33A - HDA3A   | 322.0                                                | 1.111          |
| CD33C - HDA3A   | 322.0                                                | 1.111          |
| CD33C - CD2O3A  | 133.0                                                | 1.510          |
| ND2R5A - CD2R5A | 413.4                                                | 1.422          |
| ND2R5A - CD2R5B | 430.1                                                | 1.429          |
| ND2R5A - CD33G  | 215.8                                                | 1.424          |
| ND2R5B - CD2R5A | 328.0                                                | 1.416          |
| ND2R5B - CD2R5B | 486.5                                                | 1.368          |
| ND2R5C - HDP1A  | 466.0                                                | 1.000          |
| ND2R5C - CD2R5D | 394.5                                                | 1.405          |
| ND2R5C - CD2R5E | 500.4                                                | 1.378          |
| ND2R5C - CD33F  | 260.1                                                | 1.469          |
| OD2C2A - CD2O2A | 527.0                                                | 1.250          |
| OD2C3A - CD2O3A | 730.0                                                | 1.200          |
| OD31F - HDP1A   | 480.4                                                | 0.969          |
| OD31F - CD2O3A  | 205.5                                                | 1.269          |
| LPD - ND2R5B    | 0.0                                                  | 0.000          |
| LPD - OD2C2A    | 0.0                                                  | 0.000          |
| LPD - OD2C3A    | 0.0                                                  | 0.000          |
| LPD - OD31F     | 0.0                                                  | 0.000          |

Table S3: Angle parameters used in this study

| Atoms                    | $k_\theta$<br>[kcal mol <sup>-1</sup> rad <sup>-2</sup> ] | $\theta_0$<br>[°] | $k_\theta$ UB<br>[kcal mol <sup>-1</sup> rad <sup>-2</sup> ] | $\theta_0$ UB<br>[°] |
|--------------------------|-----------------------------------------------------------|-------------------|--------------------------------------------------------------|----------------------|
| HDA3A - CD33F - HDA3A    | 35.50                                                     | 108.4000          | 5.4000                                                       | 1.8020               |
| HDA3A - CD33G - HDA3A    | 35.50                                                     | 108.4000          | 5.4000                                                       | 1.8020               |
| HDA3A - CD33A - HDA3A    | 35.50                                                     | 108.4000          | 5.4000                                                       | 1.8020               |
| HDA3A - CD33C - HDA3A    | 35.50                                                     | 108.4000          | 5.4000                                                       | 1.8020               |
| CD2O2A - CD33A - HDA3A   | 27.70                                                     | 107.5000          | 25.3000                                                      | 2.1670               |
| CD2O3A - OD31F - HDP1A   | 58.90                                                     | 110.2000          | 15.1000                                                      | 2.3770               |
| CD2O3A - CD33C - HDA3A   | 33.00                                                     | 109.5000          | 30.0000                                                      | 2.1630               |
| CD2R5A - CD2R5A - HDR5A  | 36.42                                                     | 147.9600          | 11.3300                                                      | 0.0000               |
| CD2R5B - ND2R5A - CD2R5A | 79.78                                                     | 82.9800           | 0.0000                                                       | 0.0000               |
| CD2R5B - ND2R5B - CD2R5A | 94.37                                                     | 83.7800           | 0.0000                                                       | 0.0000               |
| CD2R5D - ND2R5C - HDP1A  | 28.72                                                     | 112.7000          | 10.7900                                                      | 2.2746               |
| CD2R5D - CD2R5D - HDR5D  | 36.73                                                     | 146.2500          | 9.4500                                                       | 0.0000               |
| CD2R5E - ND2R5C - HDP1A  | 27.82                                                     | 105.6100          | 16.7400                                                      | 2.5139               |
| CD2R5E - ND2R5C - CD2R5D | 94.00                                                     | 87.9000           | 0.0000                                                       | 0.0000               |
| CD33A - ND2R5A - CD2R5A  | 45.91                                                     | 118.9500          | 0.0000                                                       | 0.0000               |
| CD33A - ND2R5A - CD2R5B  | 42.22                                                     | 117.9900          | 0.0000                                                       | 0.0000               |
| CD33A - ND2R5C - CD2R5D  | 49.24                                                     | 123.2400          | 0.0000                                                       | 0.0000               |
| CD33A - ND2R5C - CD2R5E  | 49.11                                                     | 123.0200          | 0.0000                                                       | 0.0000               |
| ND2R5A - CD33A - HDA3A   | 51.72                                                     | 107.4500          | 0.0000                                                       | 0.0000               |
| ND2R5A - CD2R5A - HDR5A  | 40.89                                                     | 133.5300          | 12.1400                                                      | 0.5612               |
| ND2R5A - CD2R5B - HDR5B  | 45.01                                                     | 144.5300          | 14.3200                                                      | 0.0000               |
| ND2R5A - CD2R5A - CD2R5A | 88.69                                                     | 84.8200           | 0.0000                                                       | 0.0000               |
| ND2R5B - CD2R5A - HDR5A  | 45.44                                                     | 136.2200          | 9.9800                                                       | 0.0396               |
| ND2R5B - CD2R5B - HDR5B  | 44.18                                                     | 144.5300          | 14.1600                                                      | 0.2283               |
| ND2R5B - CD2R5A - CD2R5A | 96.13                                                     | 90.7700           | 0.0000                                                       | 0.0000               |
| ND2R5B - CD2R5B - ND2R5A | 101.77                                                    | 95.9400           | 0.0000                                                       | 0.0000               |
| ND2R5C - CD33A - HDA3A   | 56.76                                                     | 107.5500          | 0.0000                                                       | 0.0000               |
| ND2R5C - CD2R5D - HDR5D  | 43.35                                                     | 133.1900          | 8.3300                                                       | 0.0000               |
| ND2R5C - CD2R5E - HDR5E  | 39.84                                                     | 137.7700          | 8.5600                                                       | 0.0000               |
| ND2R5C - CD2R5D - CD2R5D | 97.52                                                     | 85.8900           | 0.0000                                                       | 0.0000               |
| ND2R5C - CD2R5E - ND2R5C | 111.97                                                    | 97.2300           | 0.0000                                                       | 0.0000               |
| OD2C2A - CD2O2A - CD33A  | 23.80                                                     | 123.0000          | 34.9000                                                      | 2.3910               |
| OD2C2A - CD2O2A - OD2C2A | 83.70                                                     | 127.9000          | 128.8000                                                     | 2.3790               |
| OD2C3A - CD2O3A - CD33C  | 70.00                                                     | 126.0000          | 20.0000                                                      | 2.4420               |
| OD31F - CD2O3A - CD33C   | 48.50                                                     | 113.4000          | 26.8000                                                      | 2.3370               |
| OD31F - CD2O3A - OD2C3A  | 98.80                                                     | 117.5000          | 178.3000                                                     | 2.4240               |

Table S4: Dihedral parameters used in this study

| Atoms                             | $k_\phi$<br>[kcal mol <sup>-1</sup> ] | Multiplicity | $\delta$<br>[°] |
|-----------------------------------|---------------------------------------|--------------|-----------------|
| HDR5A - CD2R5A - CD2R5A - HDR5A   | 0.87                                  | 2            | 180.0000        |
| HDR5D - CD2R5D - CD2R5D - HDR5D   | 1.14                                  | 2            | 180.0000        |
| CD2R5A - ND2R5A - CD33G - HDA3A   | 0.20                                  | 3            | 0.0000          |
| CD2R5A - ND2R5A - CD2R5B - HDR5B  | 3.41                                  | 2            | 180.0000        |
| CD2R5A - ND2R5B - CD2R5B - HDR5B  | 5.44                                  | 2            | 180.0000        |
| CD2R5B - ND2R5A - CD33G - HDA3A   | 0.16                                  | 3            | 0.0000          |
| CD2R5B - ND2R5A - CD2R5A - HDR5A  | 3.52                                  | 2            | 180.0000        |
| CD2R5B - ND2R5B - CD2R5A - HDR5A  | 5.22                                  | 2            | 180.0000        |
| CD2R5B - ND2R5A - CD2R5A - CD2R5A | 16.78                                 | 2            | 180.0000        |
| CD2R5B - ND2R5B - CD2R5A - CD2R5A | 15.37                                 | 2            | 180.0000        |
| CD2R5D - ND2R5C - CD33F - HDA3A   | 0.19                                  | 3            | 0.0000          |
| CD2R5D - ND2R5C - CD2R5E - HDR5E  | 3.58                                  | 2            | 180.0000        |
| CD2R5E - ND2R5C - CD33F - HDA3A   | 0.08                                  | 3            | 0.0000          |
| CD2R5E - ND2R5C - CD2R5D - HDR5D  | 3.96                                  | 2            | 180.0000        |
| CD2R5E - ND2R5C - CD2R5D - CD2R5D | 14.88                                 | 2            | 180.0000        |
| CD33G - ND2R5A - CD2R5A - HDR5A   | 0.41                                  | 2            | 180.0000        |
| CD33G - ND2R5A - CD2R5B - HDR5B   | 0.39                                  | 2            | 180.0000        |
| CD33F - ND2R5C - CD2R5D - HDR5D   | 0.81                                  | 2            | 180.0000        |
| CD33F - ND2R5C - CD2R5E - HDR5E   | 1.32                                  | 2            | 180.0000        |
| CD33G - ND2R5A - CD2R5A - CD2R5A  | 2.89                                  | 2            | 180.0000        |
| CD33F - ND2R5C - CD2R5D - CD2R5D  | 3.17                                  | 2            | 180.0000        |
| ND2R5A - CD2R5A - CD2R5A - HDR5A  | 3.93                                  | 2            | 180.0000        |
| ND2R5B - CD2R5A - CD2R5A - HDR5A  | 3.85                                  | 2            | 180.0000        |
| ND2R5B - CD2R5A - CD2R5A - ND2R5A | 20.41                                 | 2            | 180.0000        |
| ND2R5C - CD2R5D - CD2R5D - HDR5D  | 4.43                                  | 2            | 180.0000        |
| ND2R5C - CD2R5D - CD2R5D - ND2R5C | 22.94                                 | 2            | 180.0000        |
| HDP1A - ND2R5C - CD2R5D - HDR5D   | 0.78                                  | 2            | 180.0000        |
| HDP1A - ND2R5C - CD2R5E - HDR5E   | 1.17                                  | 2            | 180.0000        |
| HDP1A - ND2R5C - CD2R5D - CD2R5D  | 3.78                                  | 2            | 180.0000        |
| HDP1A - OD31F - CD2O3A - CD33C    | 3.76                                  | 2            | 180.0000        |
| CD2R5A - ND2R5B - CD2R5B - ND2R5A | 19.75                                 | 2            | 180.0000        |
| CD2R5A - ND2R5A - CD2R5B - ND2R5B | 16.21                                 | 2            | 180.0000        |
| CD33G - ND2R5A - CD2R5B - ND2R5B  | 4.20                                  | 2            | 180.0000        |
| HDP1A - ND2R5C - CD2R5E - ND2R5C  | 4.65                                  | 2            | 180.0000        |
| CD2R5D - ND2R5C - CD2R5E - ND2R5C | 18.25                                 | 2            | 180.0000        |
| CD33F - ND2R5C - CD2R5E - ND2R5C  | 6.55                                  | 2            | 180.0000        |
| HDA3A - CD33A - CD2O2A - OD2C2A   | 0.42                                  | 3            | 180.0000        |
| HDP1A - OD31F - CD2O3A - OD2C3A   | 1.11                                  | 2            | 180.0000        |
| HDA3A - CD33C - CD2O3A - OD2C3A   | 0.00                                  | 3            | 180.0000        |
| HDA3A - CD33C - CD2O3A - OD31F    | 0.00                                  | 6            | 180.0000        |

Table S5: Improper parameters used in this study

| Atoms                            | $k_\phi$<br>[kcal mol <sup>-1</sup> rad <sup>-2</sup> ] | $\delta$<br>[°] |
|----------------------------------|---------------------------------------------------------|-----------------|
| ND2R5A - CD2R5B - CD2R5A - CD33G | 0.45                                                    | 0.0000          |
| ND2R5C - CD2R5E - CD2R5D - HDP1A | 0.45                                                    | 0.0000          |
| ND2R5C - CD2R5E - CD2R5D - CD33F | 0.45                                                    | 0.0000          |
| CD2R5E - ND2R5C - ND2R5C - HDR5E | 0.50                                                    | 0.0000          |
| CD2R5A - CD2R5A - ND2R5A - HDR5A | 0.50                                                    | 0.0000          |
| CD2R5A - CD2R5A - ND2R5B - HDR5A | 0.50                                                    | 0.0000          |
| CD2R5B - ND2R5A - ND2R5B - HDR5B | 0.50                                                    | 0.0000          |
| CD2R5D - CD2R5D - ND2R5C - HDR5D | 0.50                                                    | 0.0000          |
| OD2C2A - CD33A - OD2C2A - CD2O2A | 71.00                                                   | 0.0000          |
| OD2C3A - CD33C - OD31F - CD2O3A  | 85.00                                                   | 0.0000          |

### 1.3 Lennard-Jones parameter

Adding Drude particles to a non-polarizable force field results in a double-counting of dispersion interactions. The Lennard-Jones parameters in the non-polarizable force field take already the average effect of these interactions into account.

Instead of reparametrizing all Lennard-Jones interactions after switching on the Drude oscillators, we scale the  $\epsilon$ -values according to the empirical equation

$$\epsilon_{\beta}^{LJ} = \epsilon_{\beta}^{LJ,unscaled} \frac{\left(\max(\alpha_{\beta}) - \alpha_{\beta}\right) + \lambda \max(\alpha_{\beta})}{\max(\alpha_{\beta}) + \lambda \left(\max(\alpha_{\beta}) - \alpha_{\beta}\right)} \quad (1)$$

$\max(\alpha_{\beta})$  is the largest atomic polarizability in our system, *i.e.* the polarizability of the atom type CD33C of HOAc. The Lennard-Jones  $\sigma$  is untouched by this scaling.

In the CHARMM force field, the distance for the minimum of the Lennard-Jones potential is used. It can be easily calculated from the Lennard-Jones  $\sigma$ :

$$r_{min} = 2^{1/6} \cdot \sigma \quad (2)$$

$$r_{min}/2 = 2^{-5/6} \cdot \sigma \quad (3)$$

Table S6: Nonbonded parameters for all heavy atoms in  $\text{Im}_1\text{H}^+$ ,  $\text{Im}_1$ ,  $\text{OAc}^-$ , HOAc for the scaling factors 0.25 and 0.4. Hydrogens are unaffected by the scaling and therefore not shown.

| Molecule                | Atoms  | $\epsilon_{\lambda=0.25}$<br>[kcal mol <sup>-1</sup> ] | $\epsilon_{\lambda=0.4}$<br>[kcal mol <sup>-1</sup> ] | $r_{min}/2$<br>[Å] |
|-------------------------|--------|--------------------------------------------------------|-------------------------------------------------------|--------------------|
| $\text{Im}_1\text{H}^+$ | CD33F  | -0.0486                                                | -0.0558                                               | 3.040              |
|                         | CD2R5D | -0.0329                                                | -0.0371                                               | 1.800              |
|                         | CD2R5E | -0.0597                                                | -0.0694                                               | 1.850              |
|                         | ND2R5C | -0.0791                                                | -0.0858                                               | 1.850              |
| $\text{Im}_1$           | CD33G  | -0.0513                                                | -0.0580                                               | 2.040              |
|                         | CD2R5A | -0.0523                                                | -0.0624                                               | 2.070              |
|                         | CD2R5B | -0.0680                                                | -0.0745                                               | 1.980              |
|                         | ND2R5A | -0.0578                                                | -0.0651                                               | 1.861              |
|                         | ND2R5B | -0.0511                                                | -0.0557                                               | 1.956              |
| $\text{OAc}^-$          | CD2O2A | -0.1566                                                | -0.1751                                               | 1.800              |
|                         | CD33A  | -0.0337                                                | -0.0436                                               | 2.040              |
|                         | OD2C2A | -0.1575                                                | -0.1687                                               | 1.910              |
| HOAc                    | CD2O3A | -0.0564                                                | -0.0651                                               | 1.650              |
|                         | CD33C  | -0.0195                                                | -0.0312                                               | 1.940              |
|                         | OD2C3A | -0.1141                                                | -0.1258                                               | 1.880              |
|                         | OD31F  | -0.1009                                                | -0.1180                                               | 1.710              |



## 2 Physico-chemical properties

### 2.1 Conductivity and diffusion coefficients

Table S7: Average boxlength  $L$ , density  $\rho$  and conductivity  $\sigma(0)$  of the different systems. These values are averaged over the trajectories of the three replica.

| $\phi_{IL}$ | $\lambda=0.25$ |                                 |                                       | $\lambda=0.4$ |                                 |                                       |
|-------------|----------------|---------------------------------|---------------------------------------|---------------|---------------------------------|---------------------------------------|
|             | $L$<br>[Å]     | $\rho$<br>[g cm <sup>-3</sup> ] | $\sigma(0)$<br>[mS cm <sup>-1</sup> ] | $L$<br>[Å]    | $\rho$<br>[g cm <sup>-3</sup> ] | $\sigma(0)$<br>[mS cm <sup>-1</sup> ] |
| 0.0         | 49.71          | 0.96                            | -                                     | 49.25         | 0.99                            | -                                     |
| 0.1         | 49.23          | 0.99                            | 1.87                                  | 48.90         | 1.01                            | 1.84                                  |
| 0.2         | 48.90          | 1.01                            | 2.76                                  | 48.58         | 1.03                            | 2.20                                  |
| 0.3         | 48.59          | 1.03                            | 2.85                                  | 48.29         | 1.05                            | 2.38                                  |
| 0.4         | 48.24          | 1.05                            | 2.77                                  | 48.03         | 1.07                            | 1.80                                  |
| 0.5         | 47.98          | 1.07                            | 1.82                                  | 47.78         | 1.08                            | 1.22                                  |
| 0.7         | 47.46          | 1.10                            | 0.58                                  | 47.31         | 1.11                            | 0.28                                  |
| 0.9         | 47.04          | 1.13                            | 0.14                                  | 46.95         | 1.14                            | 0.09                                  |
| 1.0         | 46.85          | 1.15                            | 0.10                                  | 46.75         | 1.16                            | 0.07                                  |

Table S8: Diffusion coefficients for all four species, average of three replica

| $\phi_{IL}$ | $\lambda=0.25$          |                                                                       |               |               | $\lambda=0.4$           |                                                                       |               |               |
|-------------|-------------------------|-----------------------------------------------------------------------|---------------|---------------|-------------------------|-----------------------------------------------------------------------|---------------|---------------|
|             | $\text{Im}_1\text{H}^+$ | $\text{OAc}^-$<br>[10 <sup>-8</sup> cm <sup>2</sup> s <sup>-1</sup> ] | $\text{Im}_1$ | $\text{HOAc}$ | $\text{Im}_1\text{H}^+$ | $\text{OAc}^-$<br>[10 <sup>-8</sup> cm <sup>2</sup> s <sup>-1</sup> ] | $\text{Im}_1$ | $\text{HOAc}$ |
| 0.0         | -                       | -                                                                     | 791.858       | 682.270       | -                       | -                                                                     | 553.391       | 501.306       |
| 0.1         | 200.009                 | 195.309                                                               | 519.620       | 394.798       | 146.988                 | 136.843                                                               | 386.904       | 310.026       |
| 0.2         | 112.268                 | 108.854                                                               | 350.007       | 234.159       | 82.6900                 | 80.3211                                                               | 250.054       | 183.570       |
| 0.3         | 63.6601                 | 59.6877                                                               | 223.418       | 135.755       | 45.6798                 | 44.3336                                                               | 151.728       | 103.475       |
| 0.4         | 32.6145                 | 31.0725                                                               | 119.935       | 69.5578       | 23.6877                 | 22.5152                                                               | 81.5990       | 52.7524       |
| 0.5         | 15.1213                 | 13.8313                                                               | 63.0723       | 34.1194       | 10.3093                 | 9.81508                                                               | 43.3023       | 25.9586       |
| 0.7         | 2.59998                 | 2.31557                                                               | 11.0175       | 7.08491       | 1.37953                 | 1.22568                                                               | 5.87537       | 3.83983       |
| 0.9         | 0.45291                 | 0.38553                                                               | 1.55147       | 1.15477       | 0.32470                 | 0.27562                                                               | 0.87525       | 0.72008       |
| 1.0         | 0.26304                 | 0.21010                                                               | -             | -             | 0.17975                 | 0.15183                                                               | -             | -             |

## 2.2 Haven ratio of the Nernst-Einstein relation

Based on the diffusion coefficients, the Nernst-Einstein conductivity can be obtained via

$$\sigma_{NE} = \frac{1}{k_B T} \sum_k |q_k|^2 \rho_k D_k \quad (4)$$

It usually overestimates the conductivity of the system as correlations between the species are ignored. This overestimation is usually quantified by the Haven ratio ( $1 - \Delta$ )

$$\sigma(0) = \sigma_{NE} \cdot (1 - \Delta) \quad (5)$$

However, as shown in Fig. S3 this ratio is a function of the fraction  $\phi_{IL}$  of charged molecules and far from being constant. The  $\Delta$ -parameter of the Haven ratio decreases with increasing  $\phi_{IL}$ . In other words, the collective effects are stronger at lower content of the ions.

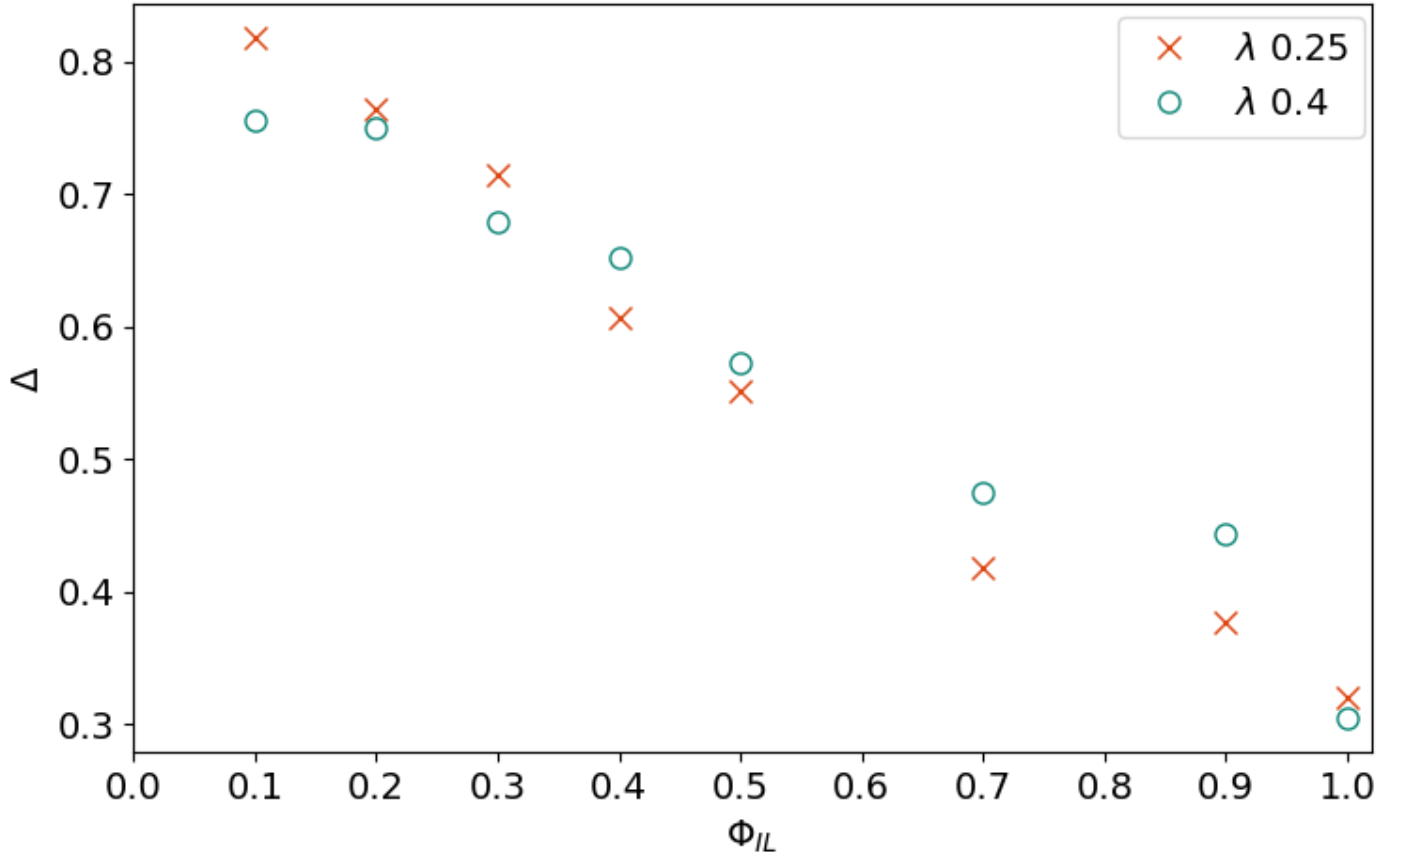

Figure S3:  $\Delta(\phi_{IL})$  for  $\lambda$  0.25 and 0.4.

### 2.3 Bahe-Varela fits

Figure S4 shows the conductivity at  $\lambda = 0.25$  for the fits described in Ref. 1 also including a quadratic and cubic term. Including these terms leads to unphysical behaviour for  $\phi_{IL} > 0.8$ .

$$\frac{\sigma(0)}{\max(\sigma(0))} = 2\xi_{IL}(1 - \xi_{IL}) \quad (6)$$

$$\frac{\sigma(0)}{\max(\sigma(0))} = 2\xi_{IL}(1 - \xi_{IL}) + A \xi_{IL}(1 - \xi_{IL})^2 \quad (7)$$

$$\frac{\sigma(0)}{\max(\sigma(0))} = 2\xi_{IL}(1 - \xi_{IL}) + A \xi_{IL}(1 - \xi_{IL})^2 + B \xi_{IL}(1 - \xi_{IL})^3 \quad (8)$$

with  $\xi_{IL} = \phi_{IL}/\phi_{IL}(\max(\sigma(0)))$ .

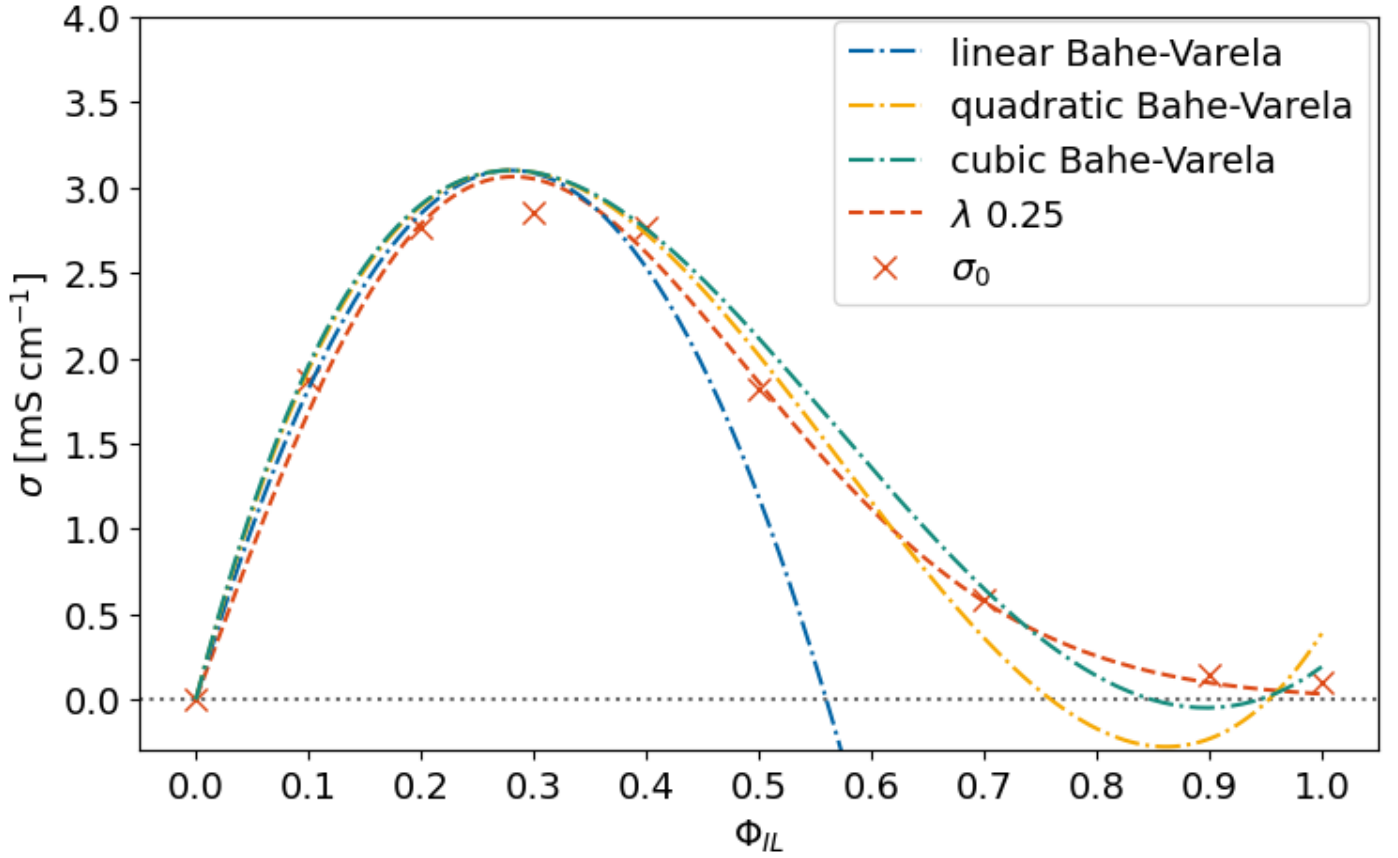

Figure S4: Fits of the conductivity at  $\lambda = 0.25$  with a linear, quadratic and cubic Bahe-Varela fitfunction (Eq. 6-8).

## 2.4 Computational dielectric spectrum

In order to compute the high-frequency limit  $\epsilon_\infty$  of our mixtures, the molecular polarizabilities  $\alpha_k$  and volumes  $V_k$  of each species are needed. The dipole moments and polarizabilities are obtained from Gaussian frequency calculations on a B3LYP/6-311+G\*\* level of theory. All dipole moments are computed with respect to the center-of-mass. The molecular volumes are estimated on statistical averages taken from Ref. 2.

Table S9: Molecular dipole moments, polarizability and volume of all species  $k$ .

| Species                        | $\mu_k$<br>[D] | $\alpha_k$<br>[Å <sup>3</sup> ] | $V_k$<br>[Å <sup>3</sup> ] |
|--------------------------------|----------------|---------------------------------|----------------------------|
| Im <sub>1</sub>                | 4.3            | 8.7                             | 125.8                      |
| HOAc                           | 1.7            | 4.8                             | 73.3                       |
| Im <sub>1</sub> H <sup>+</sup> | 1.4            | 7.7                             | 131.7                      |
| OAc <sup>-</sup>               | 3.9            | 6.4                             | 67.4                       |

The high-frequency limit  $\epsilon_\infty$  of the static generalized dielectric constant  $\Sigma_0(0)$  can be estimated on the basis of a Clausius-Mossotti equation

$$\frac{\epsilon_\infty - 1}{\epsilon_\infty + 2} = \frac{4\pi}{3} \frac{\sum_k \phi_k \cdot \alpha_k}{\sum_k \phi_k \cdot V_k} \quad (9)$$

using an averaged molecular polarizability and volume. These averages are weighted by the mole fraction  $\phi_k$  of the species. Except for  $\phi = 1$  (only ionic species), the high-frequency limit  $\epsilon_\infty$  yields 2.2 which corresponds to a refractive index of 1.48. In case of  $\phi=1.0$ ,  $\epsilon_\infty$  is 2.3. In other words, the high-frequency limit  $\epsilon_\infty$  does not change as a function of the composition of our systems.

Table S10: Decomposition of the static generalized dielectric constant into contributions from each species from polarizable MD simulations applying  $\lambda=0.25$  and  $\lambda=0.4$ .

| $\phi_{IL}$ | $k$                            | $c_k$ [mol/l] | $\lambda = 0.4$ |                  |                   |               | $\lambda = 0.25$ |                  |                   |               |
|-------------|--------------------------------|---------------|-----------------|------------------|-------------------|---------------|------------------|------------------|-------------------|---------------|
|             |                                |               | $\epsilon(0)$   | $\vartheta_0(0)$ | $\epsilon_\infty$ | $\Sigma_0(0)$ | $\epsilon(0)$    | $\vartheta_0(0)$ | $\epsilon_\infty$ | $\Sigma_0(0)$ |
| 0.0         | Im <sub>1</sub>                | 6.8           | 12.8            | -                | 2.2               | 17.9          | 12.2             | -                | 2.2               | 16.7          |
|             | HOAc                           |               | 2.9             | -                |                   |               | 2.3              | -                |                   |               |
| 0.2         | Im <sub>1</sub> H <sup>+</sup> | 1.4           | 0.9             | 11.4             | 2.2               | 33.2          | 1.2              | 12.5             | 2.2               | 36.7          |
|             | OAc <sup>-</sup>               |               | 2.6             |                  |                   |               | -                |                  |                   |               |
|             | Im <sub>1</sub>                | 5.7           | 10.5            | -                | 2.2               | 33.2          | 11.5             | -                | 2.2               | 36.7          |
|             | HOAc                           |               | 5.6             | -                |                   |               | 6.3              | -                |                   |               |
| 0.3         | Im <sub>1</sub> H <sup>+</sup> | 2.2           | 1.6             | 7.9              | 2.2               | 29.8          | 1.3              | 12.1             | 2.2               | 31.3          |
|             | OAc <sup>-</sup>               |               | 3.7             |                  |                   |               | -                |                  |                   |               |
|             | Im <sub>1</sub>                | 5.1           | 9.9             | -                | 2.2               | 29.8          | 8.2              | -                | 2.2               | 31.3          |
|             | HOAc                           |               | 4.5             | -                |                   |               | 4.4              | -                |                   |               |
| 1.0         | Im <sub>1</sub> H <sup>+</sup> | 8.1           | 1.2             | 2.6              | 2.3               | 9.7           | 0.8              | 2.8              | 2.3               | 10.6          |
|             | OAc <sup>-</sup>               |               | 3.6             |                  |                   |               | -                |                  |                   |               |

The Lennard-Jones scaling parameter  $\lambda$  has a small influence on the static dielectric parameters. However, decreasing  $\lambda=0.40$  to  $\lambda=0.25$  may increase or decrease the partial permittivities  $\epsilon_k(0)$ . The static dielectric conductivity  $\vartheta_0(0)$  seems to increase with decreasing  $\lambda$  in a non-uniform way.

The Cavell equation<sup>3</sup> reads:

$$S_k = \epsilon_k(0) = \frac{\epsilon_R}{2\epsilon_R + 1} \cdot \frac{N_A c_k}{k_B T \epsilon_0} \mu_{\text{eff},k}^2 \quad (10)$$

As our simulation contains charged species, the static dielectric constant  $\epsilon_R$  is the static value of the generalized dielectric constant  $\Sigma_0(0)$ . Using the values of Table S9 and Table S10,  $S_k$  can be correlated with  $\epsilon_k(0)$  as shown in Fig. S5. The dashed

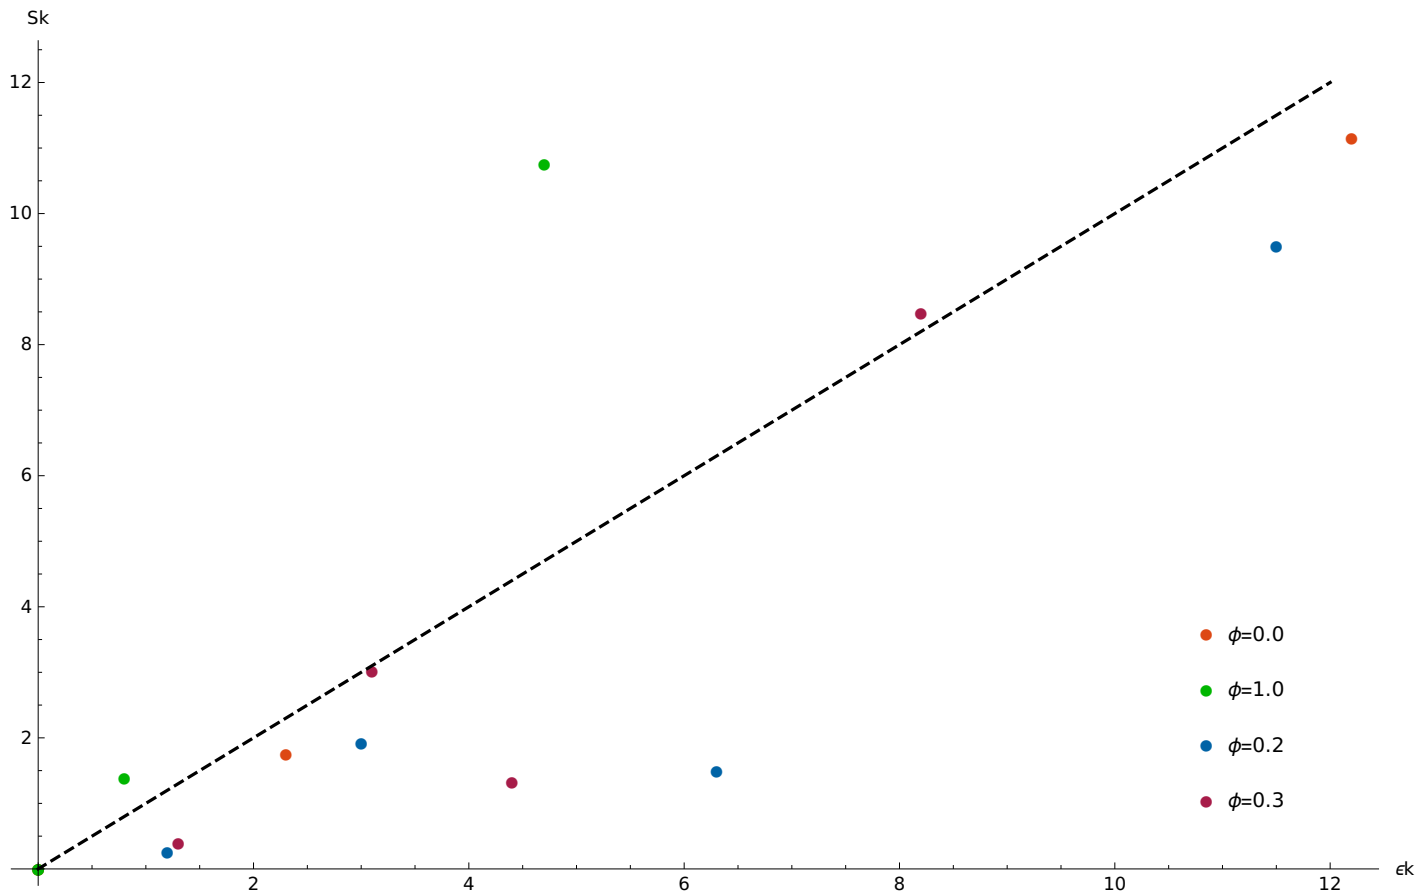

Figure S5: Correlation of the Cavell amplitudes  $S_k$  and the partial permittivities  $\epsilon_k(0)$  as a function of the composition  $\phi_{IL}$  of the mixture. In case of  $\phi_{IL} = 0.0$  and  $\phi_{IL} = 1.0$  only the neutral or charged species contribute.

line corresponds to the agreement between  $S_k$  and  $\epsilon_k(0)$ . As visible, there are many outliers to this correlation. Please keep in mind that  $\epsilon_k(0)$  is not directly accessible by the experiment as the dielectric conductivity  $\vartheta_0(0)$  contribution may overlap with the permittivity. Furthermore, even permittivity contributions of several molecular species overlap resulting in a sum amplitude.

The mutual alignment of dipoles can be characterized by the Kirkwood  $g_k$ -factor. However, as the outliers are above and below the optimal line, extremely strong parallel and antiparallel alignments have to be present in these cases. This seems very unrealistic.

## 2.5 The Voronoi shell-resolved PMF

Based on Voronoi tessellation, the coordination number  $N_{kl}$  and the shell-resolved potential of mean force  $PMF(s)$  can be computed. In Table S11 the central ion  $k$  correspond to the rows of the table. The columns concern the neighboring species  $l$ . Although the coordination numbers are symmetric, *i.e.*  $N_{kl} = N_{lk}$ , the corresponding  $PMF_{kl} \neq PMF_{lk}$  are not as the volume of the first shell  $V_k(s=1) \neq V_l(s=1)$  around the species  $k$  and  $l$  differ for  $l \neq k$ .

Table S11: Coordination numbers ( $N_{kl}$ ) and Potential of mean force ( $PMF$ ) for  $\lambda=0.25$ .

| $\phi_{IL}$ |           | $N_{kl}$  |         |        |        | $PMF$ [kJ/mol] |         |        |        |
|-------------|-----------|-----------|---------|--------|--------|----------------|---------|--------|--------|
|             |           | $Im_1H^+$ | $OAc^-$ | $Im_1$ | $HOAc$ | $Im_1H^+$      | $OAc^-$ | $Im_1$ | $HOAc$ |
| 0.0         | $Im_1H^+$ | -         | -       | -      | -      | -              | -       | -      | -      |
|             | $OAc^-$   | -         | -       | -      | -      | -              | -       | -      | -      |
|             | $Im_1$    | -         | -       | 8.40   | 7.95   | -              | -       | -0.05  | 0.09   |
|             | $HOAc$    | -         | -       | 7.95   | 5.89   | -              | -       | -0.28  | 0.47   |
| 0.1         | $Im_1H^+$ | 1.09      | 1.85    | 6.75   | 6.60   | -0.76          | -2.1    | 0.15   | 0.20   |
|             | $OAc^-$   | 1.85      | 0.35    | 5.88   | 5.18   | -2.52          | 1.75    | 0.08   | 0.40   |
|             | $Im_1$    | 0.75      | 0.65    | 7.74   | 7.22   | 0.25           | 0.60    | -0.09  | 0.08   |
|             | $HOAc$    | 0.73      | 0.58    | 7.22   | 5.31   | -0.07          | 0.54    | -0.29  | 0.47   |
| 0.2         | $Im_1H^+$ | 2.05      | 2.64    | 5.94   | 5.74   | -0.61          | -1.25   | 0.19   | 0.28   |
|             | $OAc^-$   | 2.64      | 0.77    | 5.27   | 4.57   | -1.66          | 1.45    | 0.08   | 0.43   |
|             | $Im_1$    | 1.49      | 1.32    | 7.07   | 6.51   | 0.29           | 0.59    | -0.15  | 0.06   |
|             | $HOAc$    | 1.44      | 1.14    | 6.51   | 4.77   | -0.01          | 0.56    | -0.32  | 0.45   |
| 0.3         | $Im_1H^+$ | 2.87      | 3.32    | 5.25   | 5.01   | -0.42          | -0.78   | 0.19   | 0.31   |
|             | $OAc^-$   | 3.32      | 1.21    | 4.71   | 4.01   | -1.20          | 1.32    | 0.04   | 0.45   |
|             | $Im_1$    | 2.25      | 2.02    | 6.35   | 5.79   | 0.28           | 0.55    | -0.20  | 0.03   |
|             | $HOAc$    | 2.15      | 1.72    | 5.79   | 4.22   | 0.01           | 0.56    | -0.36  | 0.43   |
| 0.4         | $Im_1H^+$ | 3.69      | 3.94    | 4.56   | 4.32   | -0.30          | -0.47   | 0.18   | 0.32   |
|             | $OAc^-$   | 3.94      | 1.67    | 4.16   | 3.48   | -0.90          | 1.25    | -0.02  | 0.43   |
|             | $Im_1$    | 3.04      | 2.77    | 5.58   | 5.04   | 0.25           | 0.48    | -0.25  | -0.003 |
|             | $HOAc$    | 2.88      | 2.32    | 5.04   | 3.64   | -0.01          | 0.53    | -0.39  | 0.42   |
| 0.5         | $Im_1H^+$ | 4.53      | 4.63    | 3.83   | 3.57   | -0.24          | -0.29   | 0.18   | 0.36   |
|             | $OAc^-$   | 4.63      | 2.20    | 3.55   | 2.91   | -0.72          | 1.13    | -0.06  | 0.44   |
|             | $Im_1$    | 3.83      | 3.55    | 4.77   | 4.30   | 0.23           | 0.42    | -0.31  | -0.06  |
|             | $HOAc$    | 3.57      | 2.91    | 4.30   | 3.13   | 0.02           | 0.53    | -0.45  | 0.35   |
| 0.7         | $Im_1H^+$ | 6.16      | 5.94    | 2.41   | 2.19   | -0.12          | -0.03   | 0.10   | 0.35   |
|             | $OAc^-$   | 5.94      | 3.33    | 2.29   | 1.79   | -0.48          | 0.96    | -0.22  | 0.40   |
|             | $Im_1$    | 5.63      | 5.35    | 2.84   | 2.69   | 0.11           | 0.23    | -0.30  | -0.16  |
|             | $HOAc$    | 5.10      | 4.17    | 2.69   | 1.97   | -0.03          | 0.47    | -0.55  | 0.23   |
| 0.9         | $Im_1H^+$ | 7.87      | 7.34    | 0.85   | 0.77   | -0.08          | 0.10    | -0.001 | 0.25   |
|             | $OAc^-$   | 7.34      | 4.64    | 0.81   | 0.65   | -0.37          | 0.78    | -0.34  | 0.21   |
|             | $Im_1$    | 7.64      | 7.26    | 1.00   | 0.83   | 0.002          | 0.13    | -0.35  | 0.10   |
|             | $HOAc$    | 6.90      | 5.82    | 0.83   | 0.50   | -0.16          | 0.27    | -0.31  | 0.96   |
| 1.0         | $Im_1H^+$ | 8.80      | 8.13    | -      | -      | -0.07          | 0.12    | -      | -      |
|             | $OAc^-$   | 8.13      | 5.35    | -      | -      | -0.36          | 0.69    | -      | -      |
|             | $Im_1$    | -         | -       | -      | -      | -              | -       | -      | -      |
|             | $HOAc$    | -         | -       | -      | -      | -              | -       | -      | -      |

## 2.6 Hydrogen bond lifetimes

Hydrogen bond lifetimes were analysed between the hydrogen atoms of  $\text{Im}_1\text{H}^+$  and HOAc to the oxygen atoms of HOAc or  $\text{OAc}^-$  and the nitrogen atom of  $\text{Im}_1$ <sup>4</sup>. A biexponential fit

$$C(t) = A \cdot \exp\left(\frac{-t}{\tau_1}\right) + B \cdot \exp\left(\frac{-t}{\tau_2}\right) \quad (11)$$

was used to extract the average life time as  $A \cdot \tau_1 + B \cdot \tau_2$  given in Table S12. Since these life times are quite short, we do not expect an overstabilization of them due to the induced dipoles.

Interestingly, the hydrogen bonds to N2 of the neutral 1-methylimidazole have the longest life time. Also, the hydrogen bonds between acetic acid dimers have a very short life time in our polarizable simulations.

Table S12: Hydrogen Bond lifetimes

| Species                            | life time [ps]           |                           |                          |
|------------------------------------|--------------------------|---------------------------|--------------------------|
|                                    | $\text{O}_{\text{HOAc}}$ | $\text{O}_{\text{OAc}^-}$ | $\text{N}_{\text{Im}_1}$ |
| $\text{H}_{\text{HOAc}}$           | 0.62                     | 1.87                      | 2.75                     |
| $\text{H}_{\text{Im}_1\text{H}^+}$ | 0.43                     | 1.63                      | 2.63                     |

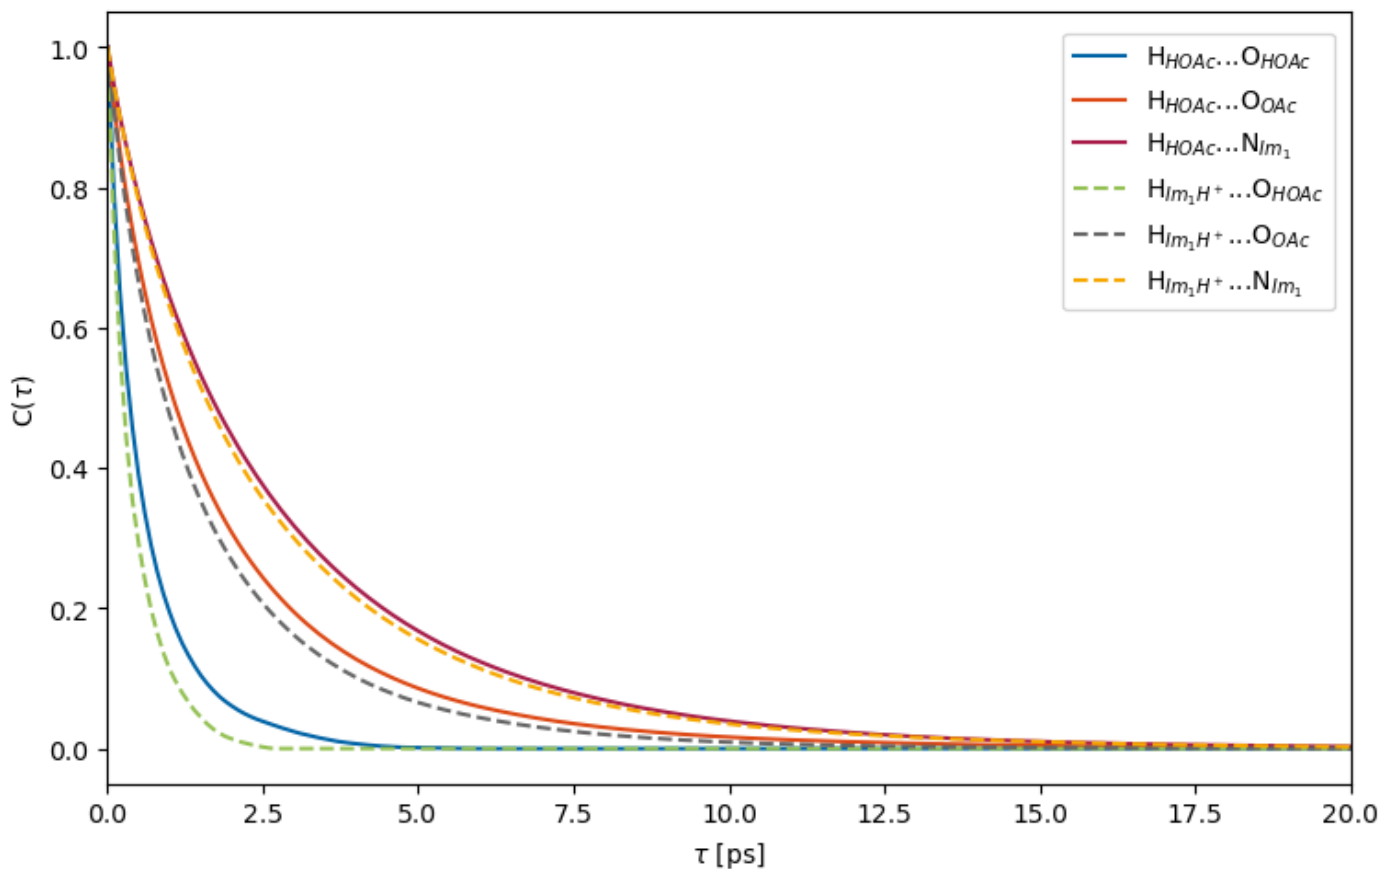

Figure S6: Hydrogen bond lifetimes of the different species.

## References

- [1] E. Rilo, J. Vila, S. García-Garabal, L. M. Varela and O. Cabeza, *J. Phys. Chem. B*, 2013, **117**, 1411–1418.
- [2] C. E. S. Bernardes, K. Shimizu, J. N. C. Lopes, P. Marquetand, E. Heid, O. Steinhauser and C. Schröder, *Phys. Chem. Chem. Phys.*, 2016, **18**, 1665–1670.
- [3] E. A. S. Cavell, P. C. Knight and M. A. Sheikh, *Trans. Faraday Soc.*, 1971, **67**, 2225–2233.
- [4] P. Smith, R. M. Ziolek, E. Gazzarrini, D. M. Owen and C. D. Lorenz, *Phys. Chem. Chem. Phys.*, 2019, **21**, 9845–9857.
